# Supplementary material for: Straightforward approach to efficient oxidative DNA cleaving agents based on Cu(ii) complexes of heterosubstituted cyclens
Source: Royal Society of Chemistry journal article supplement (doi:10.1039/c3dt32857k), 2013-01-01
Supplement: c3dt32857k.pdf [file c3dt32857k.pdf]

## Electronic Supplementary Information

Accompanying the manuscript

### **Straightforward approach to efficient oxidative DNA cleaving agents based on Cu(II) complexes of heterosubstituted cyclens**

**Jan Hormann, Chrischani Perera, Naina Deibel, Dieter Lentz, Biprajit Sarkar and Nora Kulak\***

#### **List of contents:**

- S-1: Experimental section**
- S-2: Crystallographic data**
- S-3: DNA cleavage experiments**
- S-4: Electrochemical experiments**

*Institut für Chemie und Biochemie, Freie Universität Berlin, Fabeckstr. 34/36, D-14195 Berlin, Germany. E-mail: [nora.kulak@fu-berlin.de](mailto:nora.kulak@fu-berlin.de); Fax: +49 30 838 52440; Tel: +49 30 838 54697*

## S-1: Experimental Section

### Synthesis of [12]aneN<sub>4</sub> (L1)

*N,N',N''*-Tris(*p*-tolylsulfonyl)diethylentriamine<sup>1</sup>, disodium *N,N',N''*-tris(*p*-tolylsulfonyl)diethylentriamine<sup>1</sup>, *N,O,O'*-tris(*p*-tolylsulfonyl)diethanolamine<sup>2</sup> and 1,4,7,10-tetrakis(*p*-tolylsulfonyl)-1,4,7,10-tetraazacyclododecane<sup>3</sup> were prepared as previously described. The deprotection was accomplished according to a procedure published by Brosse *et al.*<sup>4</sup> Alternatively, [12]aneN<sub>4</sub> was obtained as a donation from mivenion GmbH.

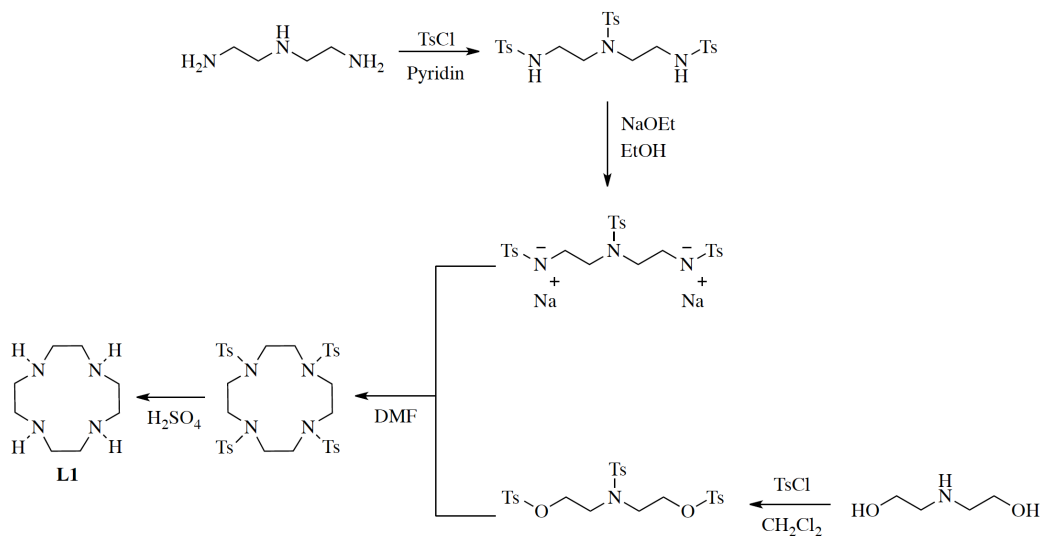

Fig. S-1,1. Synthesis of [12]aneN<sub>4</sub> (L1).

### Synthesis of [12]aneN<sub>3</sub>O (L2)

*O,O'*-Bis(*p*-tolylsulfonyl)-oxapentane<sup>5</sup>, 4,7,10-tris(*p*-tolylsulfonyl)-1-oxa-4,7,10-triazacyclododecane<sup>6</sup> and 1-oxa-4,7,10-triazacyclododecane<sup>7</sup> were prepared as previously described.

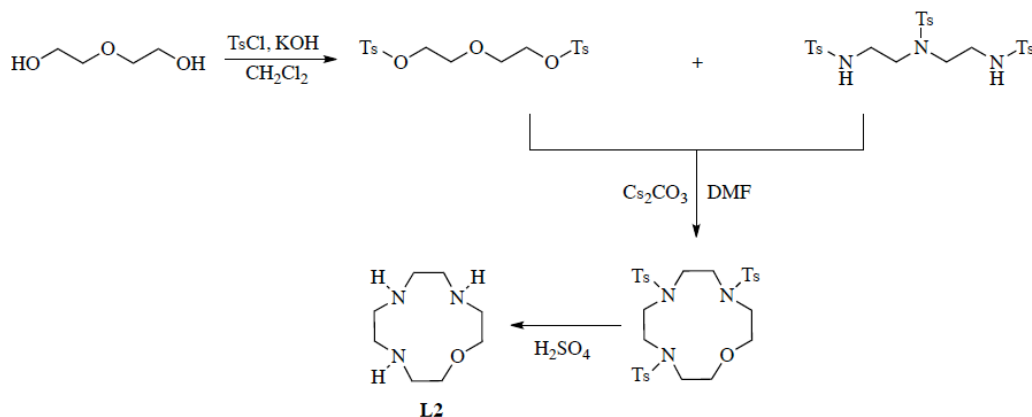

Fig. S-1,2. Synthesis of [12]aneN<sub>3</sub>O (L2).

### Synthesis of [12]aneN<sub>3</sub>S (L3)

Bis[*p*-tolylsulfonylamino]ethylsulfide<sup>8</sup>, disodium bis[*p*-tolylsulfonylamino]ethylsulfide<sup>8</sup> and 4,7,10-tris(*p*-tolylsulfonyl)-1-thia-4,7,10-triazacyclododecane<sup>9</sup> were synthesised as previously described. The deprotection of 4,7,10-tris(*p*-tolylsulfonyl)-1-thia-4,7,10-triazacyclododecane to 1-thia-4,7,10-triazacyclododecane was performed in analogy to the procedure published by Brosse *et al.*<sup>4</sup> originally developed for the deprotection of 1,4,7,10-tetrakis(*p*-tolylsulfonyl)-1,4,7,10-tetraazacyclododecane.

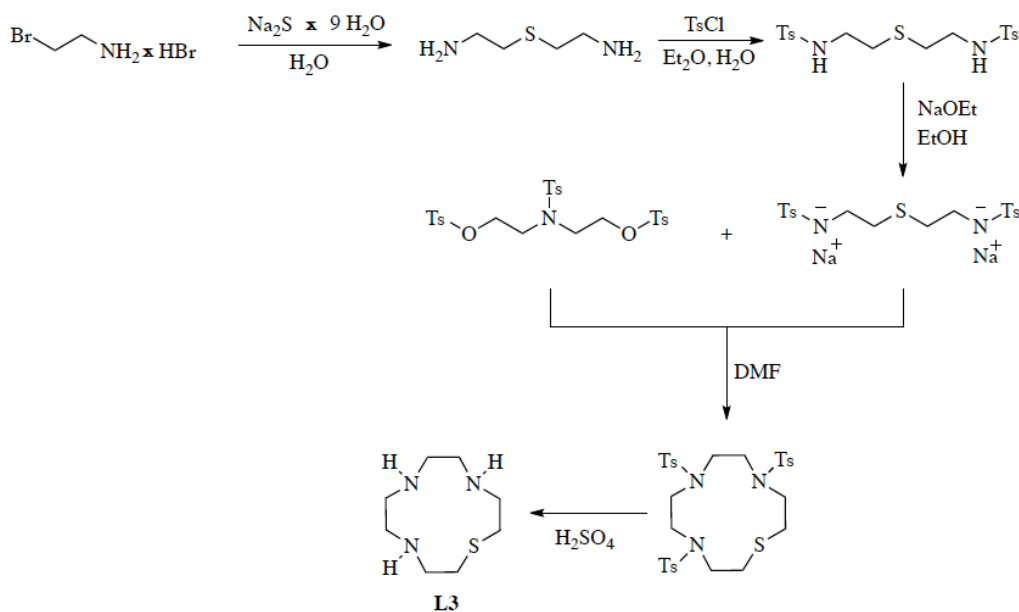

Fig. S-1,3. Synthesis of [12]aneN<sub>3</sub>S (L3).

### General procedure for the synthesis of the metal complexes 1, 2 and 3

To a solution of the corresponding ligand L1 - L3 (0.6 mmol) in 1 mL methanol a solution of copper nitrate trihydrate (0.6 mmol) in 2 mL methanol was added via a syringe. The solution was stirred for 10 minutes under reflux and the product was crystallised upon cooling at -19 °C. Crystals were filtered off, washed with ethanol and dried in vacuum. Crystals suitable for X-ray analysis of complexes 2 and 3 were obtained by slow diffusion of diethyl ether into a methanolic solution of the complex.

[Cu([12]aneN<sub>4</sub>)(NO<sub>3</sub>)]NO<sub>3</sub> (1): Yield: 0.1310 g (60%). Elemental analysis (C<sub>8</sub>H<sub>20</sub>CuN<sub>6</sub>O<sub>6</sub>): calcd. C 26.78, H 5.65 and N 23.31%; found C 26.70, H 5.60 and N 23.36%. IR  $\tilde{\nu}$  = 3232 (m,  $\nu$  NH), 2928 and 2881 (w,  $\nu$  CH<sub>2</sub>), 1425 (m,  $\delta$  CH<sub>2</sub>), 1300 (s,  $\nu$  NO<sub>3</sub><sup>-</sup>), 1078 (m), 981 (m), 812 (m) cm<sup>-1</sup>. UV/VIS  $\lambda_{\text{max}}$  (fig. S-1,4): 600 nm ( $\epsilon$  = 275.0 L mol<sup>-1</sup> cm<sup>-1</sup>). MS (ESI<sup>+</sup>) (m/z): calcd. for [1-H-2NO<sub>3</sub>]<sup>+</sup> 234.0900; found 234.0908.

[Cu([12]aneN<sub>3</sub>O)(NO<sub>3</sub>)]NO<sub>3</sub> (**2**): Yield: 0.1440 g (63%). Elemental analysis (C<sub>8</sub>H<sub>19</sub>CuN<sub>5</sub>O<sub>7</sub>): calcd. C 26.63, H 5.31 and N 19.41%; found C 26.64, H 5.34 and N 19.42%. IR  $\tilde{\nu}$  = 3209 and 3156 (w,  $\nu$  NH), 2940 and 2892 (w,  $\nu$  CH<sub>2</sub>), 1746 (vw,  $\delta$  NH), 1483 (m,  $\delta$  CH<sub>2</sub>), 1316 and 1278 (s,  $\nu$  NO<sub>3</sub><sup>-</sup>), 1002 (s), 865 (m), 824 (m) cm<sup>-1</sup>. UV/VIS  $\lambda_{\text{max}}$  (fig. S-1,4): 711 nm ( $\epsilon$  = 179.5 L mol<sup>-1</sup> cm<sup>-1</sup>). MS (ESI<sup>+</sup>) (m/z): calcd. for [**2**-H-2NO<sub>3</sub>]<sup>+</sup> 235.0745; found 235.0748.

[Cu([12]aneN<sub>3</sub>S)(NO<sub>3</sub>)]NO<sub>3</sub> (**3**): Yield: 0.0905 g (40%). Elemental analysis (C<sub>8</sub>H<sub>19</sub>CuN<sub>5</sub>O<sub>6</sub>S): calcd. for C 25.50, H 5.08, N 18.58 and S 8.51%; found C 25.60, H 5.14, N 18.53 and S 8.51%. IR  $\tilde{\nu}$  = 3216 and 3137 (w,  $\nu$  NH), 2978, 2923 and 2871 (w,  $\nu$  CH<sub>2</sub>), 1740 (vw,  $\delta$  NH), 1427 and 1388 (m,  $\delta$  CH<sub>2</sub>), 1297 (s,  $\nu$  NO<sub>3</sub><sup>-</sup>), 1099 (s) cm<sup>-1</sup>. UV/VIS  $\lambda_{\text{max}}$  (fig. S-1,4): 621 nm ( $\epsilon$  = 396.6 L mol<sup>-1</sup> cm<sup>-1</sup>). MS (ESI<sup>+</sup>) (m/z): calcd. for [**3**-H-2NO<sub>3</sub>]<sup>+</sup> 251.0512; found 251.0513.

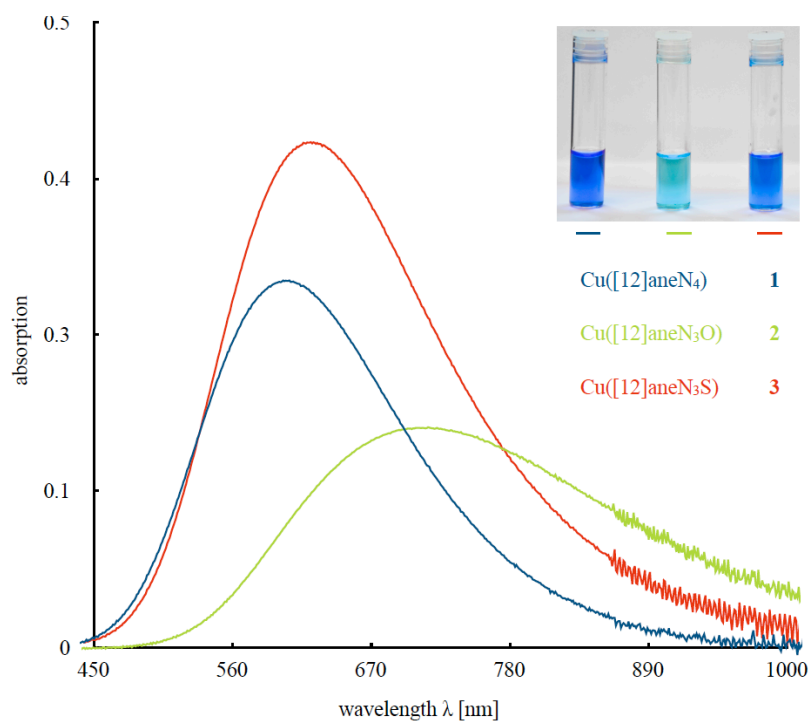

**Fig. S-1,4.** UV/Vis spectra of complexes **1**, **2** and **3** (5 mM) in 100 mM Tris-HCl buffer (pH 7.4).

## S-2: Crystallographic data

**Crystallographic details:** X-ray diffraction data were collected using a Bruker-AXS SMART CCD system. The structures were solved by direct methods and refined by full matrix least square methods, SHELX-97.<sup>10</sup>

**Table S-2,1.** Crystallographic and experimental details of complex **2**

|                                          |                                                                |
|------------------------------------------|----------------------------------------------------------------|
| Empirical formula                        | C <sub>8</sub> H <sub>19</sub> CuN <sub>5</sub> O <sub>7</sub> |
| Formula weight                           | 360.82                                                         |
| Crystal system, space group              | Monoclinic, <i>P</i> 2 <sub>1</sub> / <i>n</i>                 |
| Temperature (K)                          | 133(2)                                                         |
| <i>a</i> , <i>b</i> , <i>c</i> (Å)       | 7.9211(19), 11.979(3), 14.757(3)                               |
| β (°)                                    | 92.587(5)                                                      |
| Volume (Å <sup>3</sup> )                 | 1398.9(6)                                                      |
| <i>Z</i>                                 | 4                                                              |
| D <sub>x</sub> (Mg m <sup>-3</sup> )     | 1.713                                                          |
| Radiation type                           | Mo- <i>K</i> <sub>α</sub>                                      |
| μ (mm <sup>-1</sup> )                    | 1.604                                                          |
| F(000)                                   | 748                                                            |
| Crystal size (mm)                        | 0.40 x 0.15 x 0.07                                             |
| Theta range for data collection (°)      | 2.19 to 30.56                                                  |
| Index ranges                             | -11 ≤ <i>h</i> ≤ 11, -16 ≤ <i>k</i> ≤ 13, -21 ≤ <i>l</i> ≤ 19  |
| Reflections collected                    | 17378                                                          |
| Independent reflections                  | 4238 [ <i>R</i> (int) = 0.0253]                                |
| Completeness to Θ = 30.56° (%)           | 98.8                                                           |
| Absorption correction                    | Semi-empirical from equivalents                                |
| Max. and min. transmission               | 0.75 and 0.54                                                  |
| Refinement method                        | Full-matrix least-squares on <i>F</i> <sup>2</sup>             |
| Data / restraints / parameters           | 4238 / 0 / 202                                                 |
| Goodness-of-fit on <i>F</i> <sup>2</sup> | 1.089                                                          |

|                                                      |                                                                 |
|------------------------------------------------------|-----------------------------------------------------------------|
| Final <i>R</i> indices [ <i>I</i> > 2 σ( <i>I</i> )] | <i>R</i> <sub>1</sub> = 0.0290, <i>wR</i> <sub>2</sub> = 0.0683 |
| <i>R</i> indices (all data)                          | <i>R</i> <sub>1</sub> = 0.0399, <i>wR</i> <sub>2</sub> = 0.0731 |
| Largest diff. peak and hole (e Å <sup>-3</sup> )     | 0.597 and -0.399                                                |

**Table S-2,2.** Selected bond lengths [Å] of complex **2**

|            |            |           |            |
|------------|------------|-----------|------------|
| Cu(1)-N(2) | 1.9837(15) | C(5)-C(7) | 1.515(2)   |
| Cu(1)-N(3) | 2.0224(15) | C(7)-N(3) | 1.493(2)   |
| Cu(1)-N(1) | 2.0267(14) | C(8)-N(3) | 1.488(2)   |
| Cu(1)-O(2) | 2.0312(13) | C(8)-C(9) | 1.518(2)   |
| Cu(1)-O(1) | 2.2310(12) | C(9)-O(1) | 1.4348(19) |
| C(1)-O(1)  | 1.4347(19) | N(4)-O(4) | 1.2227(19) |
| C(1)-C(2)  | 1.518(2)   | N(4)-O(3) | 1.2457(19) |
| C(2)-N(1)  | 1.491(2)   | N(4)-O(2) | 1.2955(17) |
| C(3)-N(1)  | 1.487(2)   | N(5)-O(7) | 1.2390(19) |
| C(3)-C(4)  | 1.516(2)   | N(5)-O(6) | 1.245(2)   |
| C(4)-N(2)  | 1.478(2)   | N(5)-O(5) | 1.261(2)   |
| C(5)-N(2)  | 1.478(2)   |           |            |

**Table S-2,3.** Angles [°] of complex **2**

|                 |            |                 |            |
|-----------------|------------|-----------------|------------|
| N(2)-Cu(1)-N(3) | 86.73(6)   | C(3)-N(1)-Cu(1) | 106.34(10) |
| N(2)-Cu(1)-N(1) | 86.54(6)   | C(2)-N(1)-Cu(1) | 110.47(10) |
| N(3)-Cu(1)-N(1) | 159.40(6)  | C(5)-N(2)-C(4)  | 116.26(13) |
| N(2)-Cu(1)-O(2) | 152.88(5)  | C(5)-N(2)-Cu(1) | 108.56(10) |
| N(3)-Cu(1)-O(2) | 95.04(5)   | C(4)-N(2)-Cu(1) | 109.51(10) |
| N(1)-Cu(1)-O(2) | 99.78(5)   | C(8)-N(3)-C(7)  | 116.14(14) |
| N(2)-Cu(1)-O(1) | 110.88(5)  | C(8)-N(3)-Cu(1) | 109.56(10) |
| N(3)-Cu(1)-O(1) | 82.29(5)   | C(7)-N(3)-Cu(1) | 107.12(10) |
| N(1)-Cu(1)-O(1) | 81.97(5)   | O(4)-N(4)-O(3)  | 122.78(13) |
| O(2)-Cu(1)-O(1) | 96.15(4)   | O(4)-N(4)-O(2)  | 119.69(14) |
| O(1)-C(1)-C(2)  | 107.37(13) | O(3)-N(4)-O(2)  | 117.52(13) |

|                |            |                 |            |
|----------------|------------|-----------------|------------|
| N(1)-C(2)-C(1) | 113.26(13) | O(7)-N(5)-O(6)  | 120.67(16) |
| N(1)-C(3)-C(4) | 110.72(13) | O(7)-N(5)-O(5)  | 120.30(15) |
| N(2)-C(4)-C(3) | 107.68(13) | O(6)-N(5)-O(5)  | 119.03(14) |
| N(2)-C(5)-C(7) | 107.96(14) | C(1)-O(1)-C(9)  | 114.87(13) |
| N(3)-C(7)-C(5) | 111.10(13) | C(1)-O(1)-Cu(1) | 105.20(8)  |
| N(3)-C(8)-C(9) | 112.92(13) | C(9)-O(1)-Cu(1) | 106.23(9)  |
| O(1)-C(9)-C(8) | 107.24(13) | N(4)-O(2)-Cu(1) | 102.11(9)  |
| C(3)-N(1)-C(2) | 115.28(13) |                 |            |

**Table S-2,4.** Crystallographic and experimental details of complex **3**

|                                      |                                                                  |
|--------------------------------------|------------------------------------------------------------------|
| Empirical formula                    | C <sub>8</sub> H <sub>19</sub> CuN <sub>5</sub> O <sub>6</sub> S |
| Formula weight                       | 376.88                                                           |
| Crystal system, space group          | Monoclinic, <i>P</i> 2 <sub>1</sub> / <i>c</i>                   |
| Temperature (K)                      | 133(2)                                                           |
| <i>a</i> , <i>b</i> , <i>c</i> (Å)   | 8.5321(16), 11.903(2), 14.168(3)                                 |
| β (°)                                | 94.368(4)°                                                       |
| Volume (Å <sup>3</sup> )             | 1434.7(5)                                                        |
| <i>Z</i>                             | 4                                                                |
| D <sub>x</sub> (Mg m <sup>-3</sup> ) | 1.745                                                            |
| Radiation type                       | Mo- <i>K</i> <sub>α</sub>                                        |
| μ (mm <sup>-1</sup> )                | 1.703                                                            |
| F(000)                               | 780                                                              |
| Crystal size (mm)                    | 0.40 x 0.15 x 0.07                                               |
| Theta range for data collection (°)  | 2.24 to 30.56                                                    |
| Index ranges                         | -11 ≤ <i>h</i> ≤ 12, -15 ≤ <i>k</i> ≤ 16, -19 ≤ <i>l</i> ≤ 20    |
| Reflections collected                | 17105                                                            |
| Independent reflections              | 4381 [ <i>R</i> (int) = 0.0143]                                  |
| Completeness to Θ = 30.56° (%)       | 99.7                                                             |

|                                                      |                                    |
|------------------------------------------------------|------------------------------------|
| Absorption correction                                | Semi-empirical from equivalents    |
| Refinement method                                    | Full-matrix least-squares on $F^2$ |
| Data / restraints / parameters                       | 4381 / 0 / 202                     |
| Goodness-of-fit on $F^2$                             | 1.129                              |
| Final $R$ indices [ $I > 2 \sigma(I)$ ]              | $R_1 = 0.0241$ , $wR_2 = 0.0639$   |
| $R$ indices (all data)                               | $R_1 = 0.0264$ , $wR_2 = 0.0649$   |
| Largest diff. peak and hole ( $e \text{ \AA}^{-3}$ ) | 0.619 and -0.288                   |

**Table S-2,5.** Selected bond lengths [ $\text{\AA}$ ] of complex **3**

|            |            |           |            |
|------------|------------|-----------|------------|
| Cu(1)-N(2) | 2.0027(13) | C(5)-N(2) | 1.481(2)   |
| Cu(1)-N(3) | 2.0176(13) | C(5)-C(6) | 1.516(2)   |
| Cu(1)-N(1) | 2.0423(13) | C(6)-N(3) | 1.485(2)   |
| Cu(1)-O(1) | 2.1596(11) | C(7)-N(3) | 1.478(2)   |
| Cu(1)-S(2) | 2.3283(5)  | C(7)-C(8) | 1.524(2)   |
| S(2)-C(1)  | 1.8184(16) | N(4)-O(3) | 1.2406(17) |
| S(2)-C(8)  | 1.8211(17) | N(4)-O(2) | 1.2408(18) |
| C(1)-C(2)  | 1.523(2)   | N(4)-O(1) | 1.2848(16) |
| C(2)-N(1)  | 1.485(2)   | N(5)-O(6) | 1.2383(18) |
| C(3)-N(1)  | 1.492(2)   | N(5)-O(5) | 1.2442(18) |
| C(3)-C(4)  | 1.515(2)   | N(5)-O(4) | 1.2640(17) |
| C(4)-N(2)  | 1.4782(19) |           |            |

**Table S-2,6.** Angles [ $^\circ$ ] of complex **3**

|                 |           |                 |            |
|-----------------|-----------|-----------------|------------|
| N(2)-Cu(1)-N(3) | 86.19(5)  | N(3)-C(7)-C(8)  | 108.85(13) |
| N(2)-Cu(1)-N(1) | 85.81(5)  | C(7)-C(8)-S(2)  | 112.58(11) |
| N(3)-Cu(1)-N(1) | 146.42(5) | C(2)-N(1)-C(3)  | 113.02(12) |
| N(2)-Cu(1)-O(1) | 101.94(5) | C(2)-N(1)-Cu(1) | 112.70(9)  |
| N(3)-Cu(1)-O(1) | 104.32(5) | C(3)-N(1)-Cu(1) | 102.27(9)  |
| N(1)-Cu(1)-O(1) | 109.24(5) | C(4)-N(2)-C(5)  | 113.93(12) |



|                 |            |                 |            |
|-----------------|------------|-----------------|------------|
| N(2)-Cu(1)-S(2) | 156.44(4)  | C(4)-N(2)-Cu(1) | 109.05(10) |
| N(3)-Cu(1)-S(2) | 87.07(4)   | C(5)-N(2)-Cu(1) | 106.30(9)  |
| N(1)-Cu(1)-S(2) | 87.42(4)   | C(7)-N(3)-C(6)  | 114.75(12) |
| O(1)-Cu(1)-S(2) | 101.60(3)  | C(7)-N(3)-Cu(1) | 106.71(9)  |
| C(1)-S(2)-C(8)  | 103.98(8)  | C(6)-N(3)-Cu(1) | 107.80(9)  |
| C(1)-S(2)-Cu(1) | 90.53(5)   | O(3)-N(4)-O(2)  | 121.54(13) |
| C(8)-S(2)-Cu(1) | 95.44(5)   | O(3)-N(4)-O(1)  | 118.42(13) |
| C(2)-C(1)-S(2)  | 107.06(10) | O(2)-N(4)-O(1)  | 120.04(13) |
| N(1)-C(2)-C(1)  | 110.99(12) | N(4)-O(1)-Cu(1) | 117.63(9)  |
| N(1)-C(3)-C(4)  | 107.38(12) | O(6)-N(5)-O(5)  | 121.96(15) |
| N(2)-C(4)-C(3)  | 109.26(12) | O(6)-N(5)-O(4)  | 119.11(14) |
| N(2)-C(5)-C(6)  | 107.51(12) | O(5)-N(5)-O(4)  | 118.93(14) |
| N(3)-C(6)-C(5)  | 109.06(12) |                 |            |

### S-3: DNA cleavage experiments

The cleavage activity of complexes **1**, **2** and **3** towards pBR322 plasmid DNA (Carl Roth) was studied using gel electrophoresis. In a typical experiment plasmid DNA ( $0.025 \mu\text{g mL}^{-1}$ ) in Tris-HCl buffer (100 mM, pH 7.4, Fisher Scientific) and ascorbic acid (0.32 mM, Acros) was mixed with different concentrations of complexes **1**, **2** and **3**. Deionized water (Millipore system) was added up to a total volume of 16  $\mu\text{L}$  before the sample was incubated for given time and temperature. After incubation samples were analysed directly or kept at  $-20 \text{ }^\circ\text{C}$  for not more than 24 h. For analysis 3  $\mu\text{L}$  of loading buffer (25 mg bromophenol blue and 4 g saccharose added up to a total volume of 10 mL with deionized water) was added and the sample was divided into two portions of 8  $\mu\text{L}$  each. These were loaded onto an agarose (Lonza, SeaKem LE) gel (1% in 0.5X TBE buffer, Fisher Scientific) containing ethidium bromide ( $1.0 \mu\text{g mL}^{-1}$ , Fisher Scientific). Electrophoresis was carried out at 40 V for 2 h using an electrophoresis unit (Carl Roth, power supply: consort EV243) in 0.5X TBE buffer. Bands were visualised by UV light and photographed using a gel documentation system (GelDoc, Bio-Rad). The intensity of the bands was measured using the reference DNA as standard. Taking into account that the supercoiled form I of plasmid DNA has a smaller affinity to bind ethidium bromide, its intensity was multiplied with a correction factor of 1.4.<sup>11</sup>

Experiments with radical scavengers were conducted as described above using either 200 mM *tert*-butanol or 200 mM DMSO as hydroxyl radical scavenger, 10 mM  $\text{NaN}_3$  as singlet oxygen scavenger, 5  $\text{mg mL}^{-1}$  catalase (bovine liver, 2000-5000 units  $\text{mL}^{-1}$ , Sigma Aldrich) in 0.25X phosphate buffered saline (PBS) as hydrogen peroxide scavenger or 313 units  $\text{mL}^{-1}$  superoxide dismutase (bovine liver, 2000-6000 units  $\text{mg}^{-1}$ , suspension in 3.8 M  $(\text{NH}_4)_2\text{SO}_4$ , Sigma Aldrich) as superoxide anion scavenger. For the sake of comparison, 214 mM  $(\text{NH}_4)_2\text{SO}_4$  and 0.25X PBS was added to all samples, since superoxide dismutase was purchased as a suspension in an ammonium sulfate solution and catalase had to be pre-incubated at  $37 \text{ }^\circ\text{C}$  in PBS.

However, experiments under argon atmosphere were conducted similar to aerobic experiments. Solutions were prepared using a glove bag (Sigma Aldrich) and degassed water (three freeze-pump-thaw cycles).

### S-3,1. Concentration dependent:

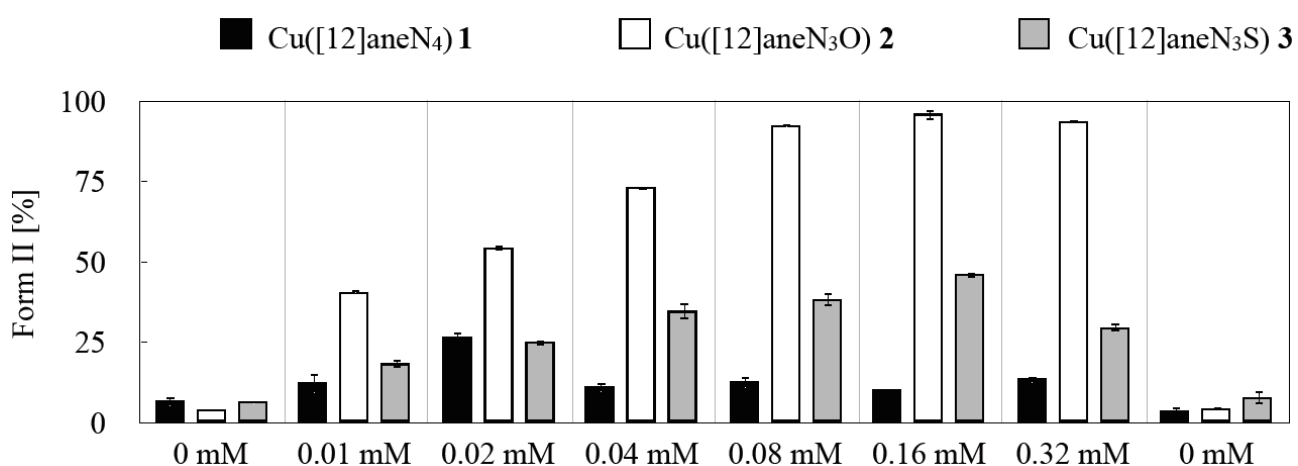

[Cu([12]aneN<sub>4</sub>)(NO<sub>3</sub>)]NO<sub>3</sub> **1**:

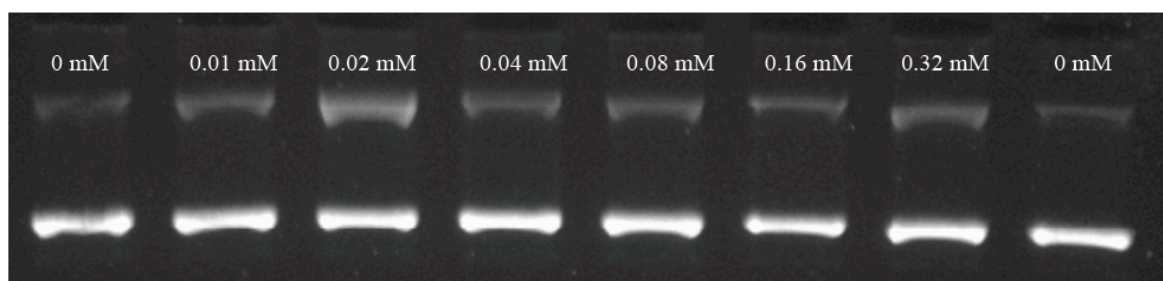

[Cu([12]aneN<sub>3</sub>O)(NO<sub>3</sub>)]NO<sub>3</sub> **2**:

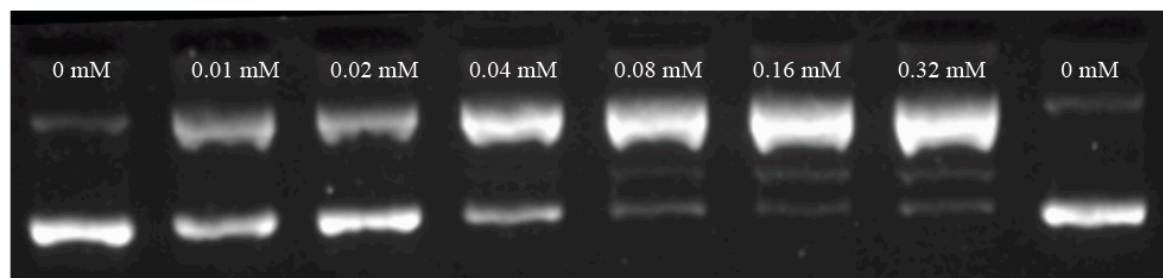

[Cu([12]aneN<sub>3</sub>S)(NO<sub>3</sub>)]NO<sub>3</sub> **3**:

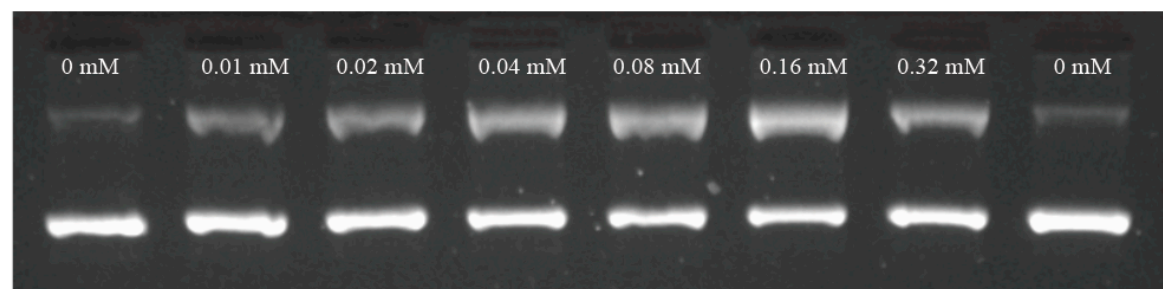

Effect of different concentrations of complexes **1**, **2** and **3** on pBR322 (0.025  $\mu\text{g } \mu\text{L}^{-1}$ ) cleavage activity in Tris-HCl buffer (100 mM, pH 7.4) and ascorbic acid (0.32 mM) at 37 °C for 2 h. Illustrated is the average of two measurements, the standard deviation is shown as error bars.

S-3,2. pH dependent:

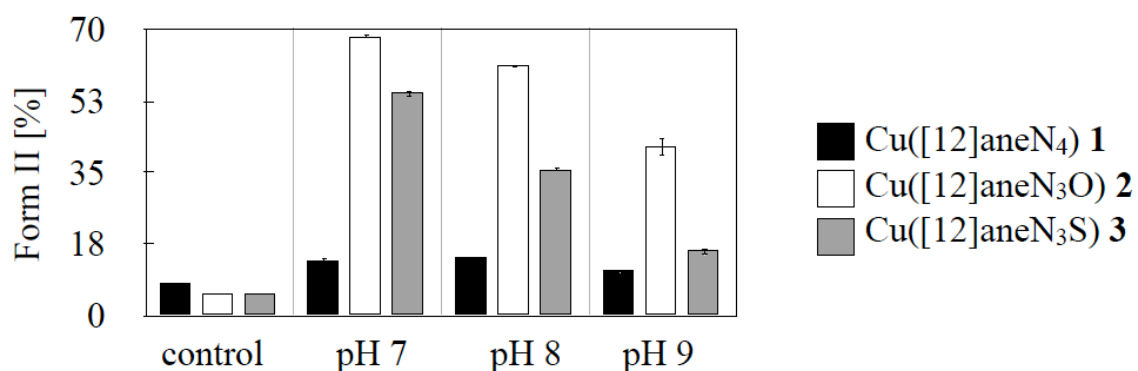

[Cu([12]aneN<sub>4</sub>)(NO<sub>3</sub>)]NO<sub>3</sub> 1:

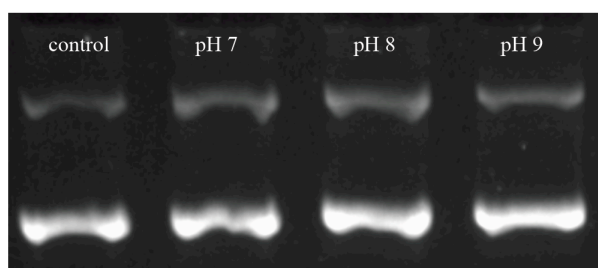

[Cu([12]aneN<sub>3</sub>O)(NO<sub>3</sub>)]NO<sub>3</sub> 2:

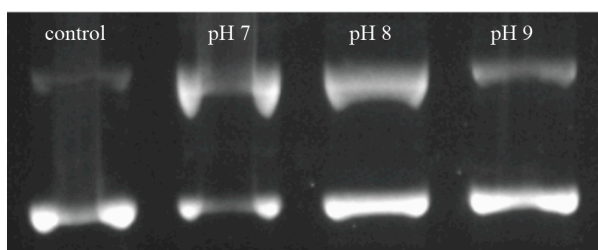

[Cu([12]aneN<sub>3</sub>S)(NO<sub>3</sub>)]NO<sub>3</sub> 3:

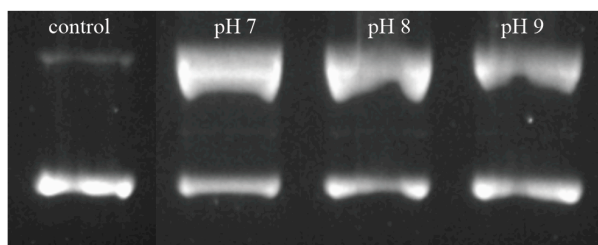

Effect of different pH values on pBR322 (0.025  $\mu\text{g } \mu\text{L}^{-1}$ ) cleavage activity of complexes 1, 2 and 3 (0.04 mM) in Tris-HCl buffer (100 mM, pH 7, pH 8 and pH 9) and ascorbic acid (0.32 mM) at 37 °C for 2 h. A control pBR322 plasmid DNA was incubated without ascorbic acid and complexes 1, 2 and 3 in Tris-HCl buffer (100 mM, pH 7). Illustrated is the average of two measurements, the standard deviation is shown as error bars.

### S-3,3. Temperature dependent:

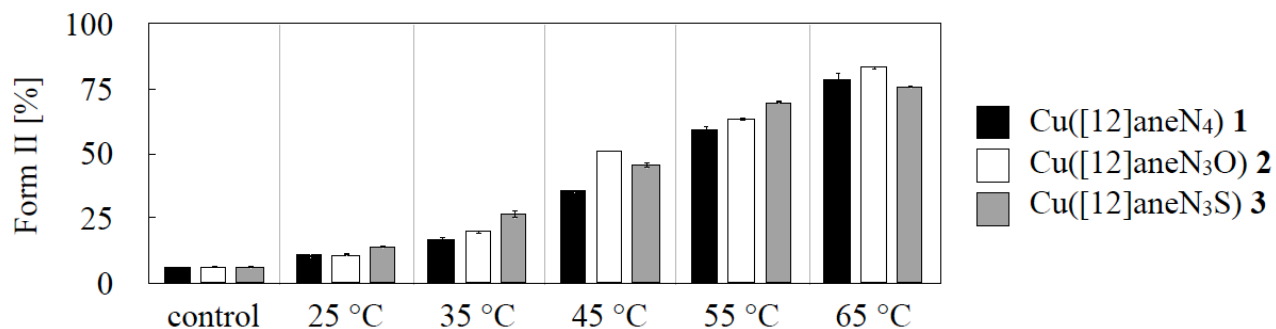

#### [Cu([12]aneN<sub>4</sub>)(NO<sub>3</sub>)]NO<sub>3</sub> 1:

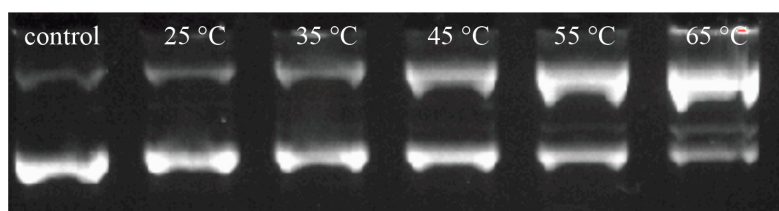

#### [Cu([12]aneN<sub>3</sub>O)(NO<sub>3</sub>)]NO<sub>3</sub> 2:

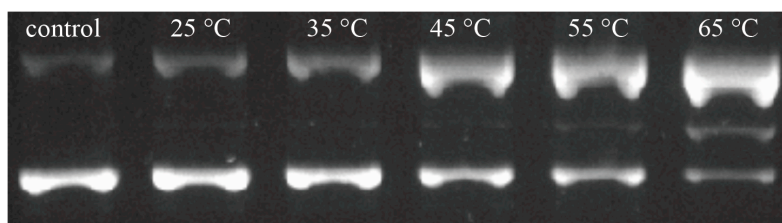

#### [Cu([12]aneN<sub>3</sub>S)(NO<sub>3</sub>)]NO<sub>3</sub> 3:

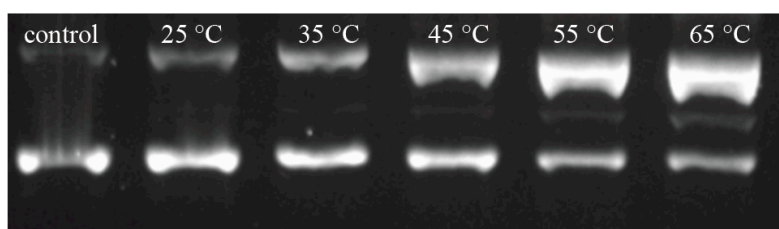

Effect of the incubation temperature on pBR322 (0.025  $\mu\text{g } \mu\text{L}^{-1}$ ) cleavage activity of complexes **1**, **2** and **3** (0.01 mM) in Tris-HCl buffer (100 mM, pH 7.4) and ascorbic acid (0.32 mM) for 2 h. A control pBR322 plasmid DNA was incubated without ascorbic acid and complexes **1**, **2** and **3** in Tris-HCl buffer at 25 °C. Illustrated is the average of two measurements, the standard deviation is shown as error bars.

S-3,4. Reaction time dependent:

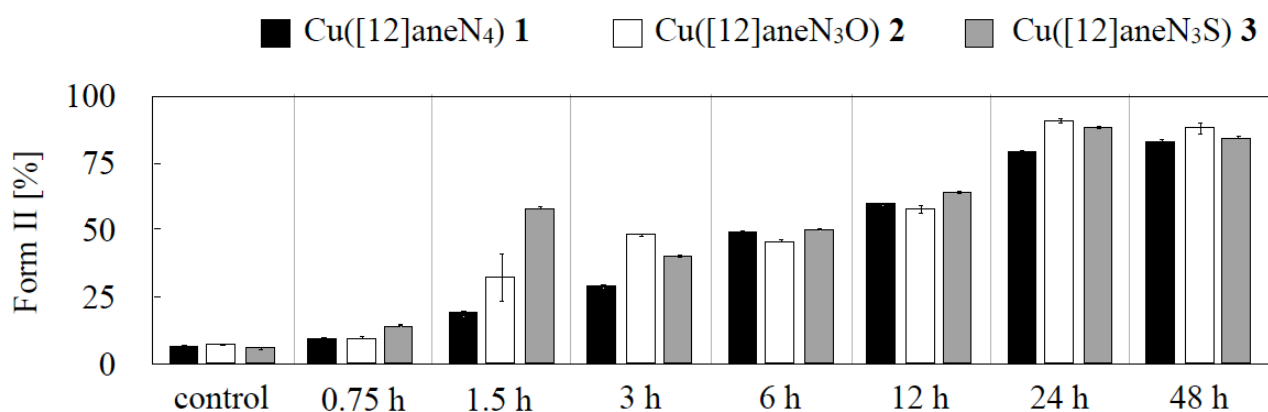

[Cu([12]aneN<sub>4</sub>)(NO<sub>3</sub>)]NO<sub>3</sub> **1**:

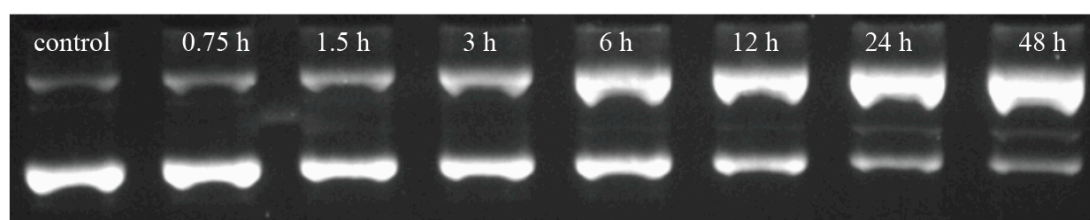

[Cu([12]aneN<sub>3</sub>O)(NO<sub>3</sub>)]NO<sub>3</sub> **2**:

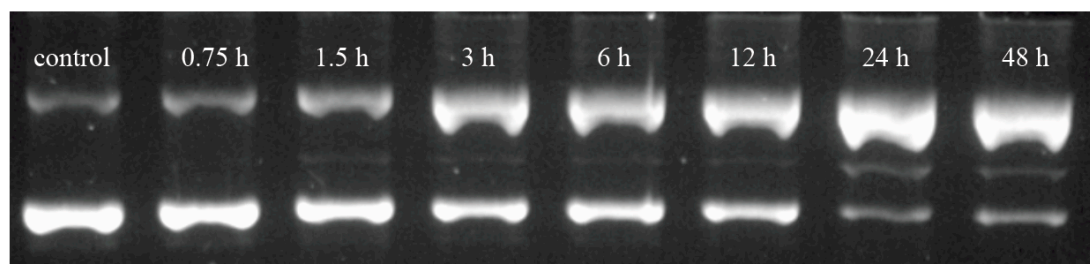

[Cu([12]aneN<sub>3</sub>S)(NO<sub>3</sub>)]NO<sub>3</sub> **3**:

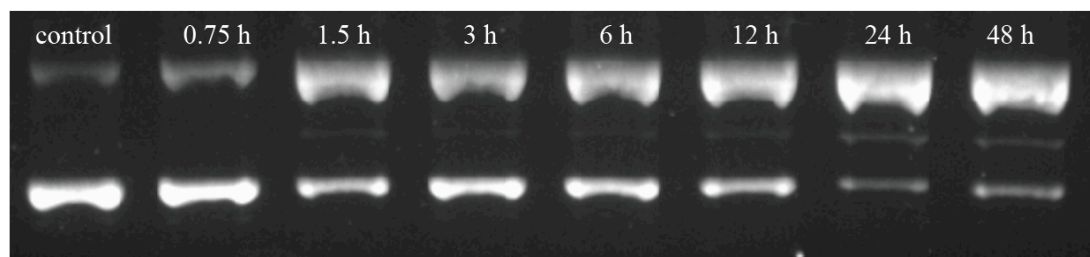

Effect of the reaction time on pBR322 (0.025  $\mu\text{g } \mu\text{L}^{-1}$ ) cleavage activity of complexes **1**, **2** and **3** (0.01 mM) in Tris-HCl buffer (100 mM, pH 7.4) and ascorbic acid (0.32 mM) at 37 °C. A control pBR322 plasmid DNA was incubated without ascorbic acid and complexes **1**, **2** and **3** in Tris-HCl buffer for 0.75 h. Illustrated is the average of two measurements, the standard deviation is shown as error bars.



### S-3,5. Presence of reactive oxygen species (ROS) scavengers:

[Cu([12]aneN<sub>4</sub>)(NO<sub>3</sub>)]NO<sub>3</sub> **1**:

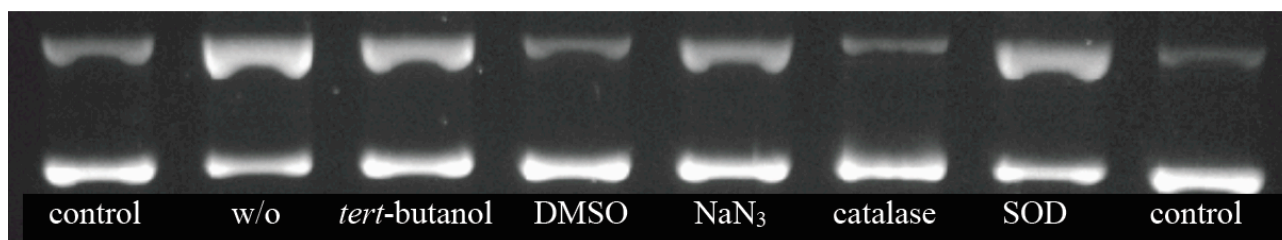

[Cu([12]aneN<sub>3</sub>O)(NO<sub>3</sub>)]NO<sub>3</sub> **2**:

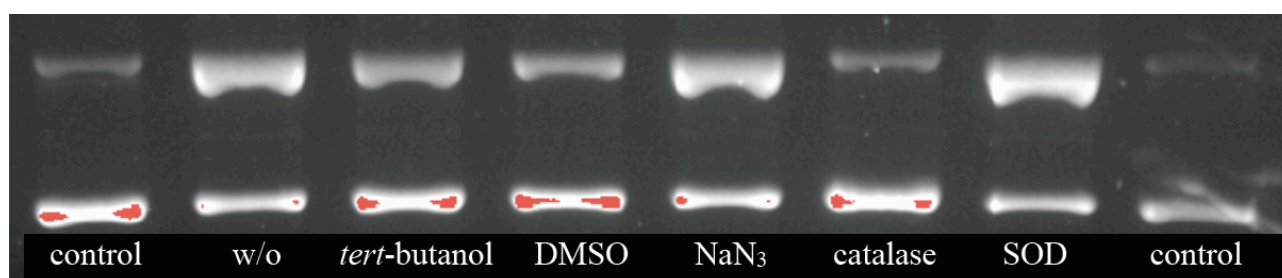

[Cu([12]aneN<sub>3</sub>S)(NO<sub>3</sub>)]NO<sub>3</sub> **3**:

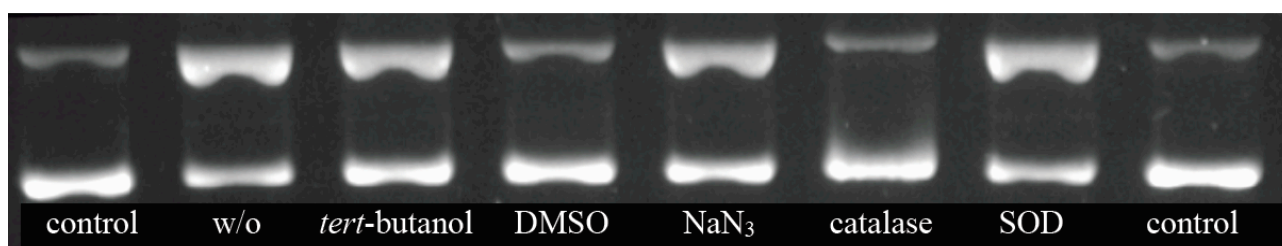

Effect of ROS scavengers on pBR322 (0.025  $\mu\text{g } \mu\text{L}^{-1}$ ) cleavage activity of complexes **1**, **2** and **3** (0.04 mM) in Tris-HCl buffer (100 mM, pH 7.4) containing 214 mM (NH<sub>4</sub>)<sub>2</sub>SO<sub>4</sub>, 0.25X PBS and ascorbic acid (0.32 mM) at 37 °C for 2 h. A control pBR322 plasmid DNA was incubated without ascorbic acid and complexes **1**, **2** and **3** in Tris-HCl buffer (control), additionally DNA was incubated with complexes **1**, **2** and **3**, but without ROS scavengers (w/o).

### S-3,6. Aerobic and anaerobic:

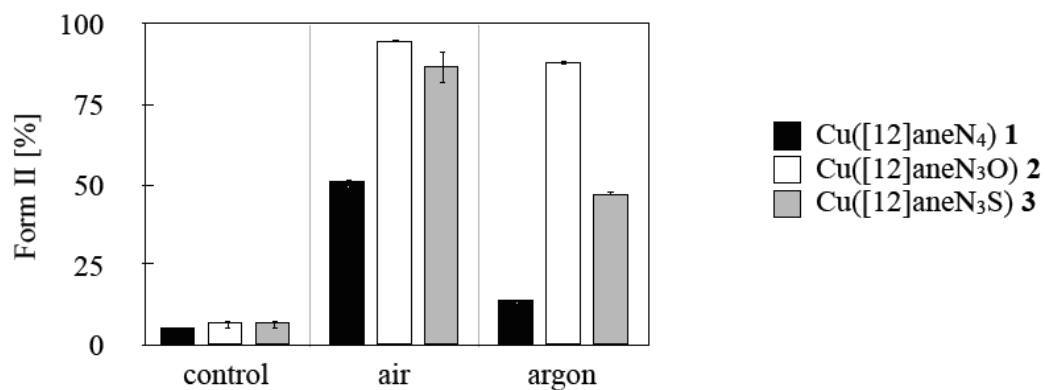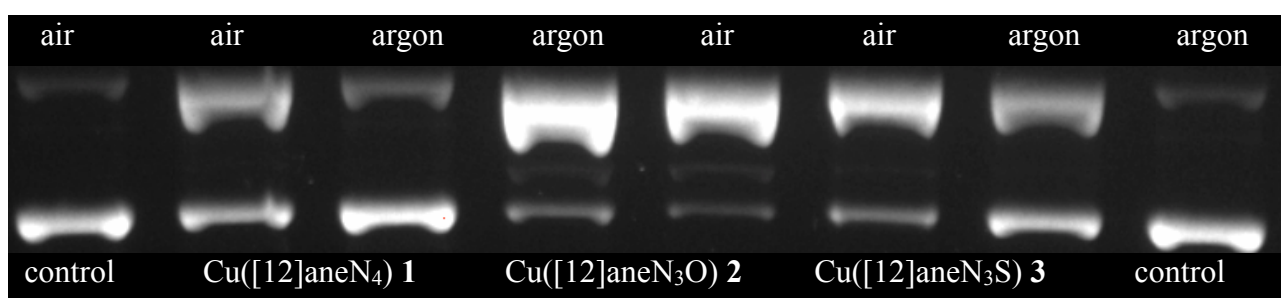

Effect of aerobic and anaerobic conditions on pBR322 (0.025  $\mu\text{g } \mu\text{L}^{-1}$ ) cleavage activity of complexes **1**, **2** and **3** (0.04 mM) in Tris-HCl buffer (100 mM, pH 7.4) and ascorbic acid (0.32 mM) at 37 °C for 2 h. A control pBR322 plasmid DNA was incubated without ascorbic acid and complexes **1**, **2** and **3** in Tris-HCl buffer under aerobic and anaerobic conditions. Illustrated is the average of two measurements, the standard deviation is shown as error bars.



## S-4: Electrochemical experiments

Cyclic voltammetry was carried out in 0.1 M KCl solutions (Millipore water) using a three-electrode configuration (glassy carbon working electrode, Pt counter electrode, Ag wire as pseudoreference) and PAR VersaSTAT 4 potentiostat. The ferrocene/ferrocenium (Fc/Fc<sup>+</sup>) couple served as internal reference. Experimental conditions were adapted from reference 12.

Redox potentials:

1:  $E_a = -1.0$  V (copper set free upon reduction,  $E_{1/2} = -0.57$  V)

2:  $E_a = -0.74$  V

3:  $E_{1/2} = -0.62$  V

S-4.1. Cyclic voltammogram of complexes 1, 2 and 3:

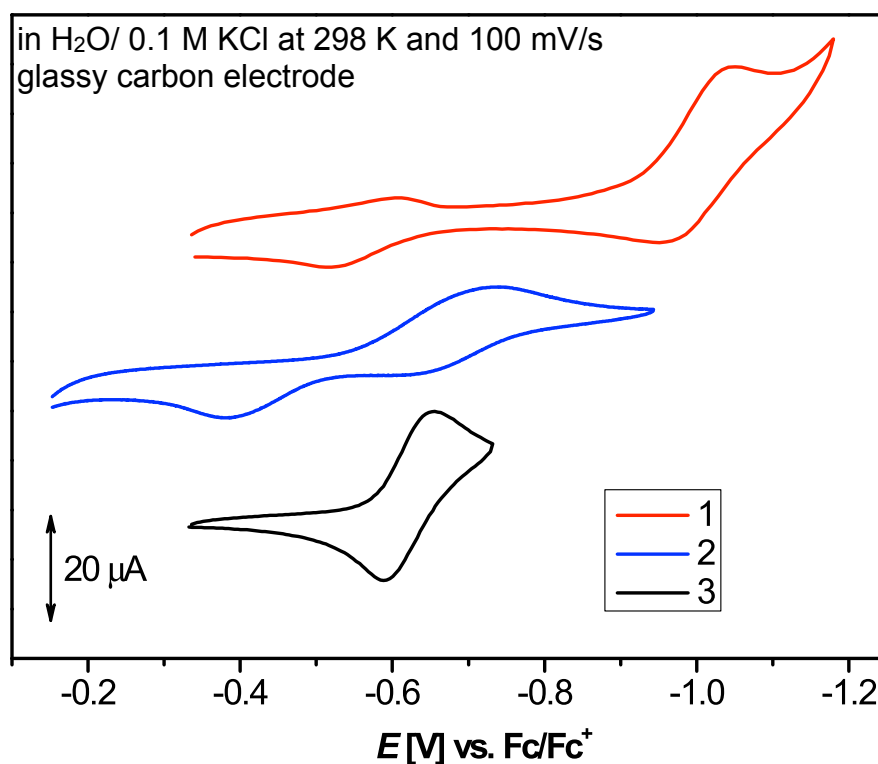

S-4,2. Dependence of copper release on number of cycles in the cyclic voltammogram of **1**:

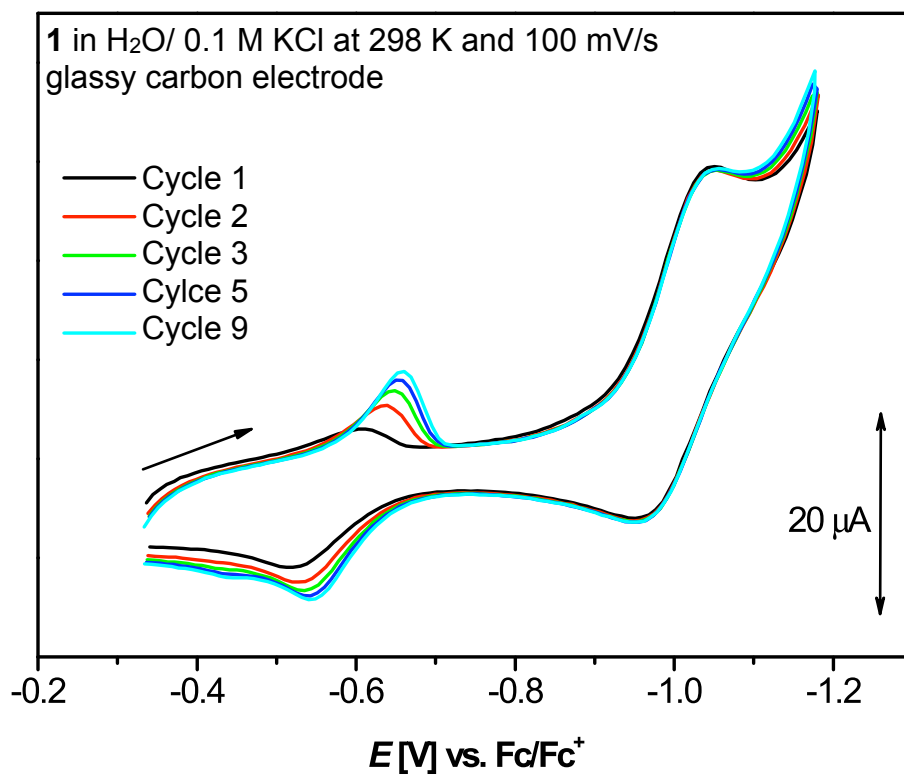

- 1 T. J. Atkins, J. E. Richman, W. F. Oettle, *Org. Synth.*, 1988, **Coll. Vol. 6**, 652.
- 2 J. Huang, Z. Zhou, T. H. Chan, *Synthesis*, 2009, **14**, 2341.
- 3 J. E. Richman, T. J. Atkins, *J. Am. Chem. Soc.*, 1974, **96**, 2268.
- 4 V. Montembault, H. Mouaziz, V. Blondeau, R. Touchard, J.-C. Soutif, J.-C. Brosse, *Synth. Commun.*, 1999, **29**, 4279.
- 5 E. M. D. Keegstra, J. W. Zwikker, M. R. Roest, L. W. Jenneskens, *J. Org. Chem.*, 1992, **57**, 6678.
- 6 C. S. Rossiter, R. A. Mathews, J. R. Morrow, *Inorg. Chem.*, 2005, **44**, 9397.
- 7 C. S. Rossiter, R. A. Mathews, I. M. A. del Mundo, J. R. Morrow, *J. Inorg. Biochem.*, 2009, **103**, 64.
- 8 P. Hoffmann, A. Steinhoff, R. Mattes, *Z. Naturforsch.*, 1987, **42b**, 867.
- 9 S. T. Marcus, P. V. Bernhardt, L. Grøndahl, L. R. Gahan, *Polyhedron*, 1999, **18**, 3451.
- 10 G. M. Sheldrick, SHELX97 - Programs for Crystal Structure Analysis (Release 97-2), Institut für Anorganische Chemie der Universität, Tammannstrasse 4, D-37077 Göttingen, Germany, 1998.
- 11 C. W. Haidle, R. S. Lloyd, D. L. Robberson, In *Bleomycin: Chemical, Biochemical, and Biological Aspects*; Springer-Verlag: New York 1979, 222-243.
- 12 L. M. P. Lima, D. Esteban-Gómez, R. Delgado, C. Platas-Iglesias, R. Tripier, *Inorg. Chem.*, 2012, **51**, 6916.
